# Supplementary material for: Predicting the crystal habit of photoinitiator XBPO and elucidating the solvent effect on crystal faces
Source: Royal Society of Chemistry journal article supplement (doi:10.1039/c8ce02114g), 2019-01-01
Supplement: c8ce02114g1.pdf [file c8ce02114g1.pdf]

## Supporting Information

### **Predicting the crystal habit of Photoinitiator XBPO and elucidating the solvent effect on crystal faces**

Pei Zhao<sup>†</sup>, Xiaohan Liu<sup>†</sup>, Liping Wang<sup>†</sup>, Zhenguo Gao<sup>†</sup>, Yang Yang<sup>†</sup>, Hongxun Hao<sup>†</sup>

,Chuang Xie<sup>†</sup> and Ying Bao<sup>\*, †, ‡, §</sup>

<sup>†</sup> State Key Laboratory of Chemical Engineering, School of Chemical Engineering and Technology, Tianjin University, Tianjin 300072, P. R. China

<sup>‡</sup> Collaborative Innovation Center of Chemistry Science and Engineering, Tianjin 300072, P. R. China

<sup>§</sup> Key Laboratory Modern Drug Delivery and High Efficiency in Tianjin, P. R. China

**Table S1** The crystal habit parameters of XBPO crystals in a vacuum predicted by the AE model<sup>a</sup>

| $(h\ k\ l)$ | Multiplicity | $d_{hkl}$ | $E_{att}$<br>(Total) | $E_{att}$<br>(vdW) | $E_{att}$<br>(Electrostatic) | Area(%) |
|-------------|--------------|-----------|----------------------|--------------------|------------------------------|---------|
| (1 0 0)     | 2            | 17.24     | -33.59               | -30.63             | -2.96                        | 46.12   |
| (1 1 0)     | 4            | 10.97     | -63.39               | -60.27             | -3.12                        | 28.41   |
| (0 1 1)     | 4            | 7.28      | -97.32               | -89.66             | -7.65                        | 12.52   |
| (1 1 -1)    | 4            | 7.30      | -97.38               | -88.92             | -8.45                        | 12.95   |

<sup>a</sup> All energies are in kcal mol<sup>-1</sup>, distances are in Å.

**Table S2** The diffusion coefficient of solvent molecules at the dominant crystal surfaces of XPBO

| Solvent | $(h\ k\ l)$ | $D/\times 10^{-9}\text{m}^2\ \text{s}^{-1}$ | $\phi$ |
|---------|-------------|---------------------------------------------|--------|
| acetone | (1 0 0)     | 2.89                                        | 1.000  |
|         | (1 1 0)     | 2.91                                        | 1.007  |
|         | (0 1 1)     | 2.55                                        | 0.882  |
|         | (1 1 -1)    | 4.15                                        | 1.436  |
| ethanol | (1 0 0)     | 1.43                                        | 1.000  |
|         | (1 1 0)     | 1.80                                        | 1.259  |
|         | (0 1 1)     | 2.43                                        | 1.699  |
|         | (1 1 -1)    | 2.80                                        | 1.958  |

**Note:** the diffusion coefficient ( $D$ ) can be calculated using its mean square displacement (MSD) with respect to time as follows:

$$D = \frac{1}{6} \lim_{t \rightarrow \infty} \frac{d}{dt} \sum_{i=1}^N \langle |r_i(t) - r_i(0)|^2 \rangle$$

where  $N$  indicates the equivalent particles,  $r_i(t)$  is the position of molecule  $i$  at time  $t$ . The values of  $D$  was evaluated using the slope of the MSD versus time (take the 35-135 ps time interval).

**Table S3** The calculation details of affinity degree at the dominant crystal surfaces of XPBO<sup>a</sup>

| Solvent | ( <i>h k l</i> ) | $\phi$ | $S$   | n  | $E_{\text{ads}}$ | $E_{\text{att}}$ | $\epsilon$ |
|---------|------------------|--------|-------|----|------------------|------------------|------------|
| acetone | (1 0 0)          | 1.000  | 1.440 | 18 | -10.344          | -33.590          | 0.887      |
|         | (1 1 0)          | 1.007  | 1.780 | 18 | -11.466          | -63.390          | 0.648      |
|         | (0 1 1)          | 0.882  | 1.700 | 18 | -12.000          | -97.320          | 0.370      |
|         | (1 1 -1)         | 1.436  | 1.580 | 18 | -13.694          | -97.380          | 0.638      |
| ethanol | (1 0 0)          | 1.000  | 1.440 | 18 | -10.600          | -33.590          | 0.909      |
|         | (1 1 0)          | 1.259  | 1.780 | 18 | -10.580          | -63.390          | 0.748      |
|         | (0 1 1)          | 1.699  | 1.700 | 18 | -9.750           | -97.320          | 0.579      |
|         | (1 1 -1)         | 1.958  | 1.580 | 18 | -13.300          | -97.380          | 0.845      |

<sup>a</sup> All energies are in kcal mol<sup>-1</sup>.

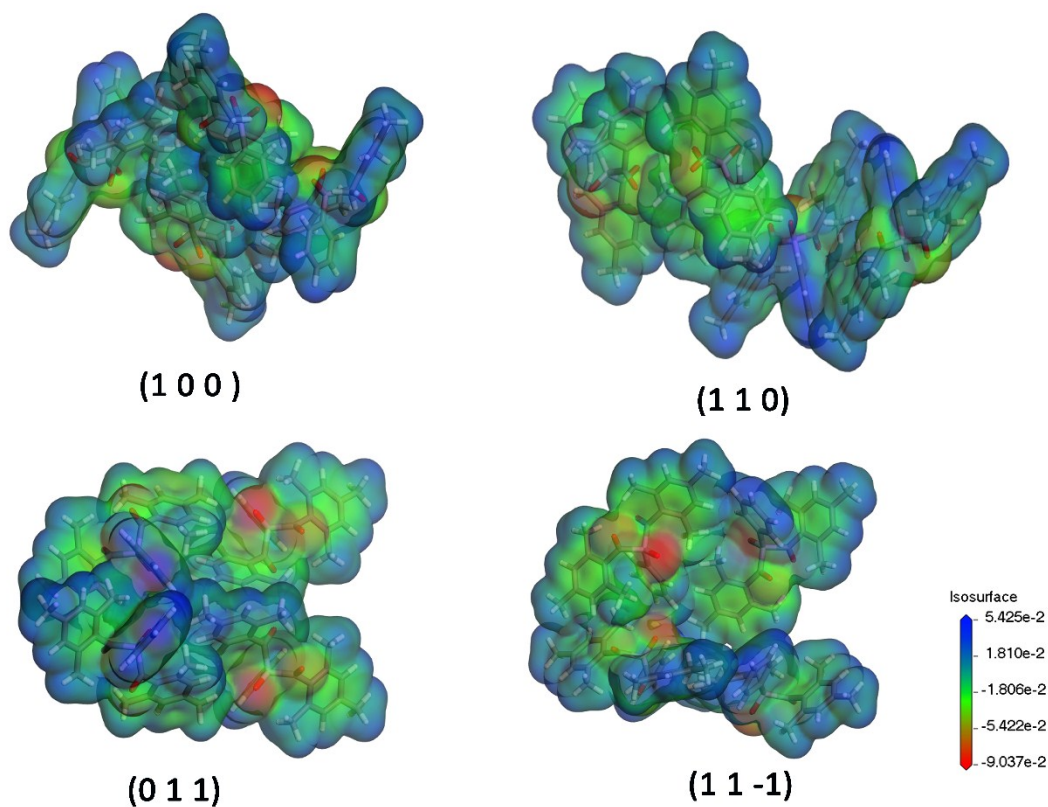

**Fig. S1** Electrostatic potential (ESP) maps of important crystal faces.

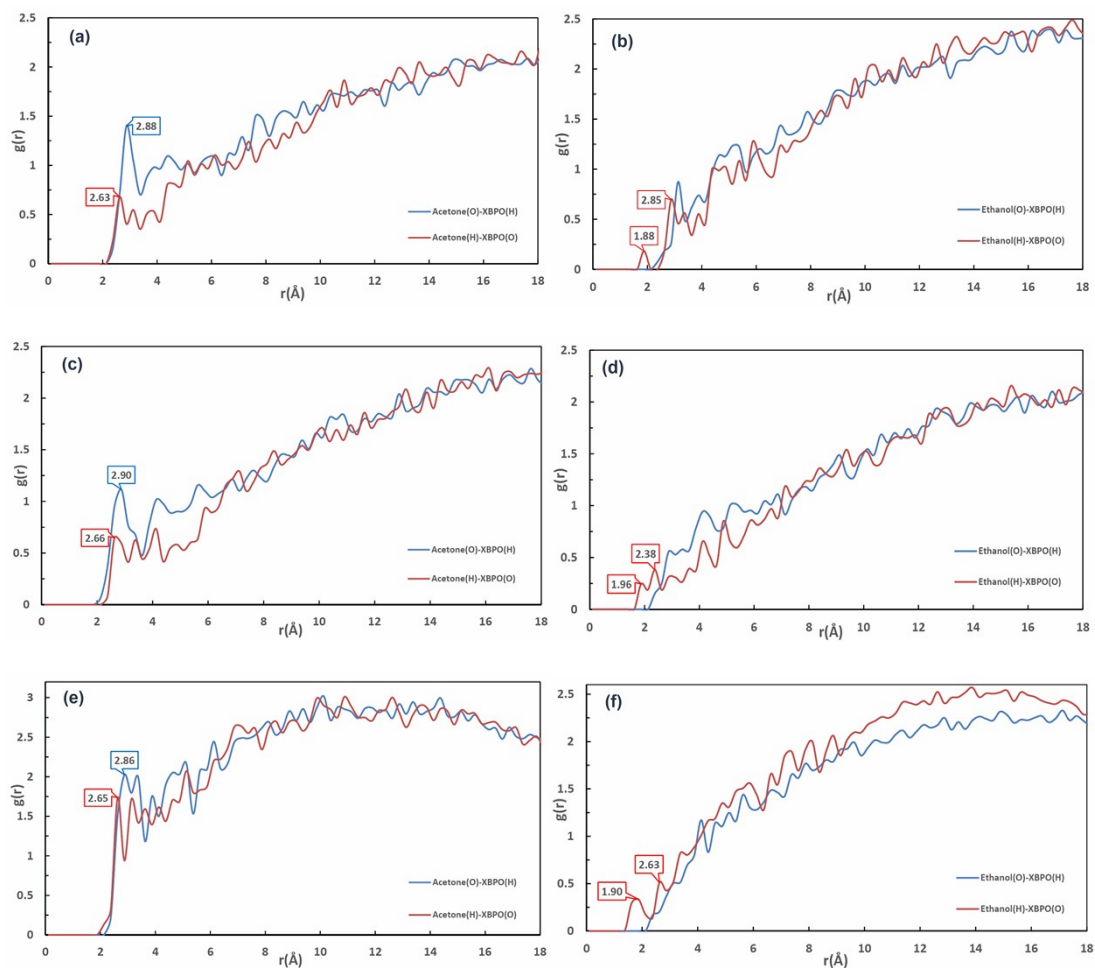

**Fig. S2** The RDF analysis between the solvent molecules and the surface of XBPO crystal in acetone/ethanol solvents. (a)(b) Correspond to the surface (1 0 0); (c)(d) Correspond to the surface (1 1 0); (e)(f) Correspond to the surface (0 1 1).

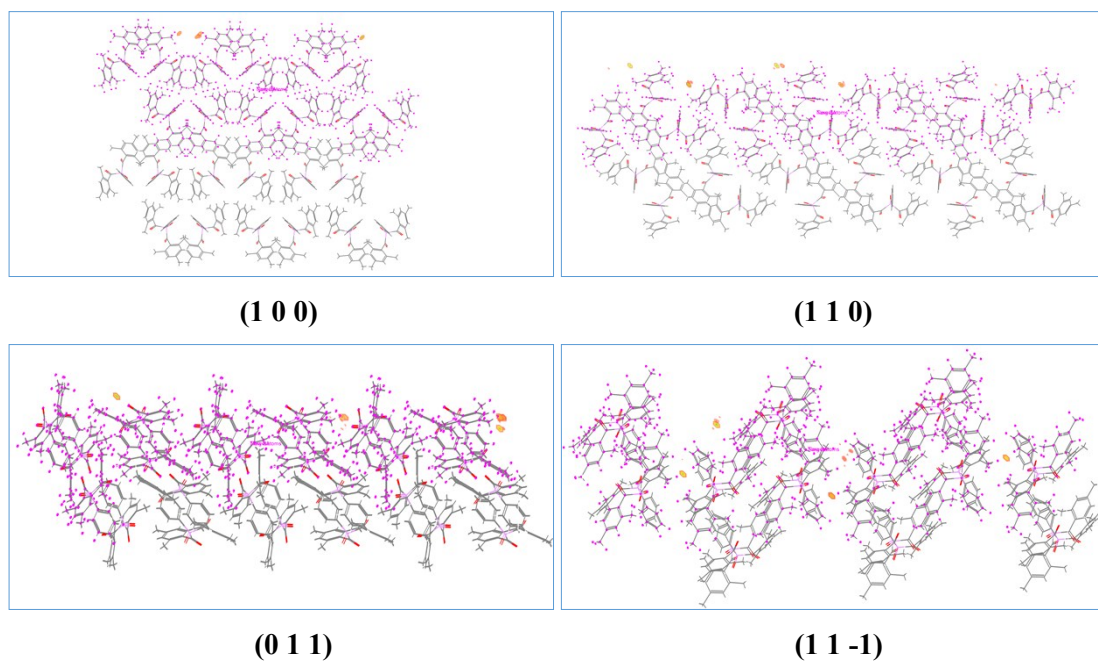

**Fig. S3** The field of adsorption sites on different crystal faces (acetone molecule).

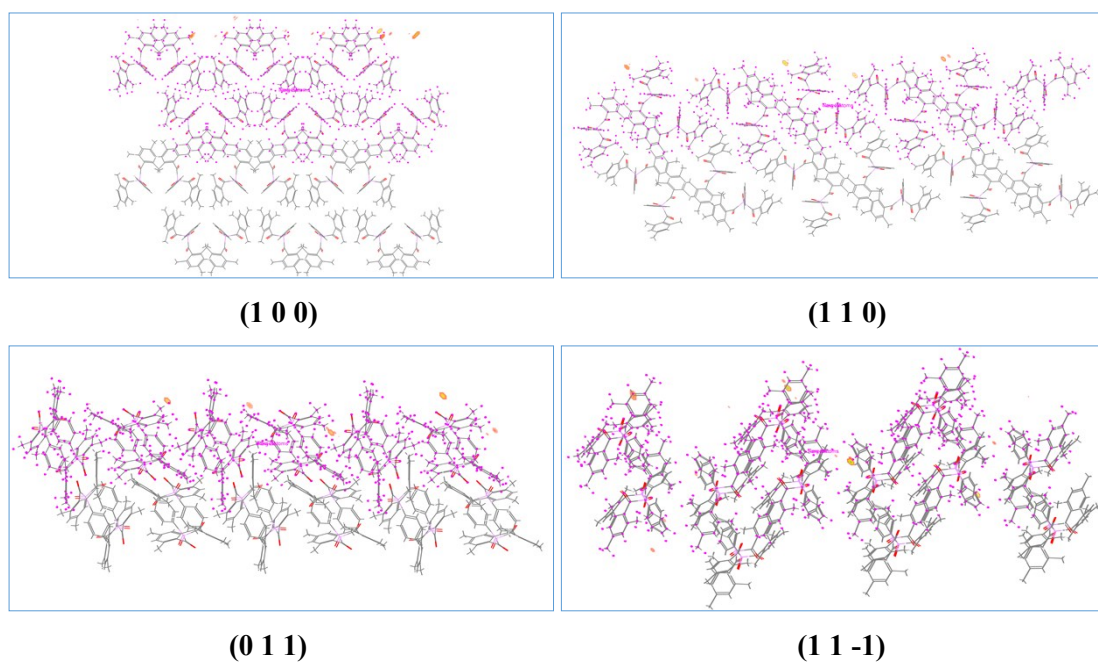

**Fig. S4** The field of adsorption sites on different crystal faces (ethanol molecule).

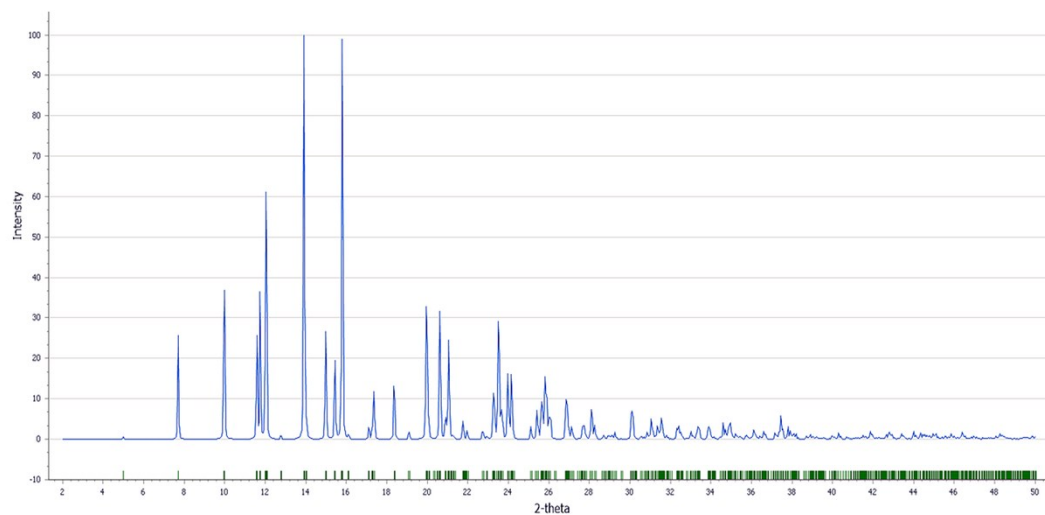

**Fig. S5** The simulated pattern of the XBPO crystal.
